# Supplementary material
Source: publisher figshare collection journal article supplement (https://acs.figshare.com/ndownloader/files/4229731)
Supplement: Supplementary file 1 [file 4229731]

data_shou6
_audit_creation_date              2011-08-01
_audit_creation_method
;
  Olex2 1.1-beta
  (compiled 2011.02.15 svn.r1672, GUI svn.r3494)
;
_chemical_name_common             ?
_chemical_name_systematic
;
 ? 
;
_chemical_formula_moiety          'C45 H43 Cl2 N O Os P2 Si, 0.5(C6H14)'
_chemical_formula_sum             'C48 H50 Cl2 N O Os P2 Si'
_chemical_formula_weight          1008.02
_chemical_melting_point           ?
loop_
  _atom_type_symbol
  _atom_type_description
  _atom_type_scat_dispersion_real
  _atom_type_scat_dispersion_imag
  _atom_type_scat_source
 'C' 'C' 0.0033 0.0016 'International Tables Vol C Tables 4.2.6.8 and 6.1.1.4'
 'H' 'H' 0.0000 0.0000 'International Tables Vol C Tables 4.2.6.8 and 6.1.1.4'
 'Cl' 'Cl' 0.1484 0.1585 'International Tables Vol C Tables 4.2.6.8 and 6.1.1.4'
 'N' 'N' 0.0061 0.0033 'International Tables Vol C Tables 4.2.6.8 and 6.1.1.4'
 'O' 'O' 0.0106 0.0060 'International Tables Vol C Tables 4.2.6.8 and 6.1.1.4'
 'Os' 'Os' -1.2165 7.6030
 'International Tables Vol C Tables 4.2.6.8 and 6.1.1.4'
 'P' 'P' 0.1023 0.0942 'International Tables Vol C Tables 4.2.6.8 and 6.1.1.4'
 'Si' 'Si' 0.0817 0.0704 'International Tables Vol C Tables 4.2.6.8 and 6.1.1.4'

_symmetry_cell_setting                   'monoclinic'
_symmetry_space_group_name_H-M 		'P2(1)/c'

_space_group_IT_number            14
_space_group_name_Hall            '-P 2ybc'
loop_
  _space_group_symop_id
  _space_group_symop_operation_xyz
 1 'x, y, z'
 2 '-x, y+1/2, -z+1/2'
 3 '-x, -y, -z'
 4 'x, -y-1/2, z-1/2'

_cell_length_a                    10.1908(10)
_cell_length_b                    17.7202(18)
_cell_length_c                    24.634(3)
_cell_angle_alpha                 90.00
_cell_angle_beta                  95.5520(10)
_cell_angle_gamma                 90.00
_cell_volume                      4427.6(8)
_cell_formula_units_Z             4
_cell_measurement_reflns_used     6463
_cell_measurement_temperature     173.15
_cell_measurement_theta_max       26.47
_cell_measurement_theta_min       2.30
_exptl_absorpt_coefficient_mu     3.137
_exptl_absorpt_correction_T_max   1
_exptl_absorpt_correction_T_min   0.872072
_exptl_absorpt_correction_type    'multi-scan'
_exptl_absorpt_process_details
;
 SADABS-2004/1 (Bruker,2004) was used for absorption correction.
 R(int) was 0.0692 before and 0.0204 after correction.
 The Ratio of minimum to maximum transmission is 0.872072.
 The \l/2 correction factor is 0.0015
;
_exptl_crystal_colour             red
_exptl_crystal_density_diffrn     1.512
_exptl_crystal_density_meas       ?
_exptl_crystal_density_method     'not measured'
_exptl_crystal_description        block
_exptl_crystal_F_000              2028
_exptl_crystal_size_max           0.2
_exptl_crystal_size_mid           0.15
_exptl_crystal_size_min           0.12
_exptl_special_details
;
 ? 
;
_diffrn_reflns_av_R_equivalents   0.0442
_diffrn_reflns_av_unetI/netI      0.0492
_diffrn_reflns_limit_h_max        12
_diffrn_reflns_limit_h_min        -12
_diffrn_reflns_limit_k_max        21
_diffrn_reflns_limit_k_min        -21
_diffrn_reflns_limit_l_max        30
_diffrn_reflns_limit_l_min        -24
_diffrn_reflns_number             27899
_diffrn_reflns_theta_full         25.00
_diffrn_reflns_theta_max          26.00
_diffrn_reflns_theta_min          1.66
_diffrn_ambient_temperature       173.15
_diffrn_detector_area_resol_mean  8
_diffrn_measured_fraction_theta_full 0.986
_diffrn_measured_fraction_theta_max 0.987
_diffrn_measurement_device_type   'Bruker SMART APEX CCD area detector'
_diffrn_measurement_method        '\w and \f scans'
_diffrn_radiation_monochromator   graphite
_diffrn_radiation_type            MoK\a
_diffrn_radiation_wavelength      0.71073
_diffrn_source                    'sealed tube'
_diffrn_source_current            30.0
_diffrn_source_power              1.5
_diffrn_source_voltage            50.0
_diffrn_standards_decay_%         ?
_diffrn_standards_interval_count  ?
_diffrn_standards_interval_time   ?
_diffrn_standards_number          ?
_reflns_number_gt                 6786
_reflns_number_total              8602
_reflns_threshold_expression      >2sigma(I)
_computing_cell_refinement        'SAINT v7.34A (Bruker, 200?)'
_computing_data_collection        ?
_computing_data_reduction         'SAINT v7.34A (Bruker, 200?)'
_computing_molecular_graphics
;
O. V. Dolomanov, L. J. Bourhis, R. J. Gildea, J. A. K. Howard and H. Puschmann,
OLEX2: a complete structure solution, refinement and analysis program.
J. Appl. Cryst. (2009). 42, 339-341.
;
_computing_publication_material
;
O. V. Dolomanov, L. J. Bourhis, R. J. Gildea, J. A. K. Howard and H. Puschmann,
OLEX2: a complete structure solution, refinement and analysis program.
J. Appl. Cryst. (2009). 42, 339-341.
;
_computing_structure_refinement   'SHELXL-97 (Sheldrick, 1997)'
_computing_structure_solution     'SHELXS-97 (Sheldrick, 1990)'
_refine_diff_density_max          0.818
_refine_diff_density_min          -0.436
_refine_diff_density_rms          0.092
_refine_ls_extinction_coef        ?
_refine_ls_extinction_method      none
_refine_ls_goodness_of_fit_ref    1.019
_refine_ls_hydrogen_treatment     constr
_refine_ls_matrix_type            full
_refine_ls_number_parameters      506
_refine_ls_number_reflns          8602
_refine_ls_number_restraints      8
_refine_ls_R_factor_all           0.0489
_refine_ls_R_factor_gt            0.0315
_refine_ls_restrained_S_all       1.024
_refine_ls_shift/su_max           0.002
_refine_ls_shift/su_mean          0.000
_refine_ls_structure_factor_coef  Fsqd
_refine_ls_weighting_details
'calc w=1/[\s^2^(Fo^2^)+(0.0250P)^2^+0.0000P] where P=(Fo^2^+2Fc^2^)/3'
_refine_ls_weighting_scheme       calc
_refine_ls_wR_factor_gt           0.0591
_refine_ls_wR_factor_ref          0.0621
_refine_special_details
;
 Refinement of F^2^ against ALL reflections.  The weighted R-factor wR and 
 goodness of fit S are based on F^2^, conventional R-factors R are based 
 on F, with F set to zero for negative F^2^. The threshold expression of 
 F^2^ > 2sigma(F^2^) is used only for calculating R-factors(gt) etc. and is 
 not relevant to the choice of reflections for refinement.  R-factors based 
 on F^2^ are statistically about twice as large as those based on F, and R- 
 factors based on ALL data will be even larger. 
;
_atom_sites_solution_hydrogens    geom
_atom_sites_solution_primary      direct
_atom_sites_solution_secondary    difmap
loop_
  _atom_site_label
  _atom_site_type_symbol
  _atom_site_fract_x
  _atom_site_fract_y
  _atom_site_fract_z
  _atom_site_U_iso_or_equiv
  _atom_site_adp_type
  _atom_site_occupancy
  _atom_site_symmetry_multiplicity
  _atom_site_calc_flag
  _atom_site_refinement_flags
  _atom_site_disorder_assembly
  _atom_site_disorder_group
 Os1 Os 0.314723(14) 0.328816(8) 0.312102(6) 0.02357(5) Uani 1 1 d . . .
 Cl1 Cl 0.35200(10) 0.19907(5) 0.28283(4) 0.0336(2) Uani 1 1 d . . .
 Cl2 Cl 0.08670(9) 0.29592(5) 0.32761(4) 0.0367(2) Uani 1 1 d . . .
 P1 P 0.37279(10) 0.28520(5) 0.40504(4) 0.0315(2) Uani 1 1 d . . .
 P2 P 0.24185(9) 0.36461(5) 0.21921(4) 0.0246(2) Uani 1 1 d . . .
 Si1 Si 0.71243(10) 0.43738(6) 0.28319(5) 0.0335(3) Uani 1 1 d . . .
 O1 O 0.1837(3) 0.55725(15) 0.38254(13) 0.0492(8) Uani 1 1 d . . .
 N1 N 0.2937(4) 0.56263(18) 0.36583(15) 0.0403(9) Uani 1 1 d . . .
 C1 C 0.4637(3) 0.37823(19) 0.30628(15) 0.0258(8) Uani 1 1 d . . .
 C2 C 0.5426(3) 0.4405(2) 0.30864(16) 0.0294(9) Uani 1 1 d . . .
 C3 C 0.4765(4) 0.5030(2) 0.32821(16) 0.0318(9) Uani 1 1 d . . .
 C4 C 0.3435(4) 0.49557(19) 0.34401(16) 0.0307(9) Uani 1 1 d . . .
 C5 C 0.2680(4) 0.43079(19) 0.33831(15) 0.0282(8) Uani 1 1 d . . .
 H5 H 0.1808 0.4356 0.3484 0.034 Uiso 1 1 calc R . .
 C6 C 0.5432(4) 0.5788(2) 0.3330(2) 0.0493(12) Uani 1 1 d . . .
 H6A H 0.6281 0.5760 0.3175 0.074 Uiso 1 1 calc R . .
 H6B H 0.5579 0.5931 0.3716 0.074 Uiso 1 1 calc R . .
 H6C H 0.4871 0.6166 0.3132 0.074 Uiso 1 1 calc R . .
 C7 C 0.7518(4) 0.3380(2) 0.26809(19) 0.0438(11) Uani 1 1 d . . .
 H7A H 0.7021 0.3226 0.2338 0.066 Uiso 1 1 calc R . .
 H7B H 0.7276 0.3055 0.2978 0.066 Uiso 1 1 calc R . .
 H7C H 0.8465 0.3332 0.2647 0.066 Uiso 1 1 calc R . .
 C8 C 0.8371(4) 0.4775(3) 0.3359(2) 0.0524(12) Uani 1 1 d . . .
 H8A H 0.9243 0.4571 0.3306 0.079 Uiso 1 1 calc R . .
 H8B H 0.8137 0.4639 0.3723 0.079 Uiso 1 1 calc R . .
 H8C H 0.8386 0.5326 0.3323 0.079 Uiso 1 1 calc R . .
 C9 C 0.7043(4) 0.4898(3) 0.2172(2) 0.0536(12) Uani 1 1 d . . .
 H9A H 0.6331 0.4691 0.1919 0.080 Uiso 1 1 calc R . .
 H9B H 0.7884 0.4845 0.2013 0.080 Uiso 1 1 calc R . .
 H9C H 0.6872 0.5433 0.2237 0.080 Uiso 1 1 calc R . .
 C11 C 0.2741(4) 0.3200(2) 0.45812(17) 0.0403(10) Uani 1 1 d . . .
 C12 C 0.2250(4) 0.2730(2) 0.49519(18) 0.0446(11) Uani 1 1 d . . .
 H12 H 0.2370 0.2201 0.4919 0.053 Uiso 1 1 calc R . .
 C13 C 0.1581(5) 0.3006(3) 0.5376(2) 0.0537(13) Uani 1 1 d . . .
 H13 H 0.1252 0.2667 0.5629 0.064 Uiso 1 1 calc R . .
 C14 C 0.1394(5) 0.3770(3) 0.5429(2) 0.0560(13) Uani 1 1 d . . .
 H14 H 0.0928 0.3964 0.5715 0.067 Uiso 1 1 calc R . .
 C15 C 0.1888(6) 0.4240(3) 0.5067(2) 0.0771(18) Uani 1 1 d . . .
 H15 H 0.1770 0.4769 0.5103 0.093 Uiso 1 1 calc R . .
 C16 C 0.2563(6) 0.3967(3) 0.4644(2) 0.0716(17) Uani 1 1 d . . .
 H16 H 0.2904 0.4310 0.4397 0.086 Uiso 1 1 calc R . .
 C17 C 0.3683(4) 0.1826(2) 0.41319(16) 0.0348(9) Uani 1 1 d . . .
 C18 C 0.2502(5) 0.1451(2) 0.39947(18) 0.0454(11) Uani 1 1 d . . .
 H18 H 0.1739 0.1725 0.3859 0.054 Uiso 1 1 calc R . .
 C19 C 0.2440(5) 0.0671(2) 0.4057(2) 0.0537(13) Uani 1 1 d . . .
 H19 H 0.1626 0.0415 0.3974 0.064 Uiso 1 1 calc R . .
 C20 C 0.3543(6) 0.0274(3) 0.4238(2) 0.0591(14) Uani 1 1 d . . .
 H20 H 0.3498 -0.0259 0.4274 0.071 Uiso 1 1 calc R . .
 C21 C 0.4703(6) 0.0637(3) 0.4366(2) 0.0587(14) Uani 1 1 d . . .
 H21 H 0.5467 0.0355 0.4492 0.070 Uiso 1 1 calc R . .
 C22 C 0.4788(5) 0.1413(2) 0.43171(18) 0.0439(11) Uani 1 1 d . . .
 H22 H 0.5604 0.1662 0.4410 0.053 Uiso 1 1 calc R . .
 C23 C 0.5424(5) 0.3093(2) 0.42976(18) 0.0432(11) Uani 1 1 d . . .
 C24 C 0.5768(6) 0.3415(3) 0.4805(2) 0.0649(15) Uani 1 1 d . . .
 H24 H 0.5111 0.3540 0.5038 0.078 Uiso 1 1 calc R . .
 C25 C 0.7121(8) 0.3554(4) 0.4969(3) 0.093(2) Uani 1 1 d . . .
 H25 H 0.7376 0.3774 0.5315 0.112 Uiso 1 1 calc R . .
 C26 C 0.8046(8) 0.3372(4) 0.4633(4) 0.109(3) Uani 1 1 d . . .
 H26 H 0.8947 0.3472 0.4747 0.131 Uiso 1 1 calc R . .
 C27 C 0.7730(5) 0.3053(4) 0.4138(3) 0.085(2) Uani 1 1 d . . .
 H27 H 0.8401 0.2926 0.3911 0.102 Uiso 1 1 calc R . .
 C28 C 0.6413(4) 0.2911(3) 0.3965(2) 0.0566(13) Uani 1 1 d . . .
 H28 H 0.6184 0.2690 0.3617 0.068 Uiso 1 1 calc R . .
 C29 C 0.2121(4) 0.46588(19) 0.21556(15) 0.0269(8) Uani 1 1 d . . .
 C30 C 0.3113(4) 0.5152(2) 0.20307(17) 0.0357(9) Uani 1 1 d . . .
 H30 H 0.3928 0.4962 0.1930 0.043 Uiso 1 1 calc R . .
 C31 C 0.2895(5) 0.5928(2) 0.2055(2) 0.0493(12) Uani 1 1 d . . .
 H31 H 0.3579 0.6267 0.1983 0.059 Uiso 1 1 calc R . .
 C32 C 0.1695(5) 0.6211(2) 0.2182(2) 0.0549(13) Uani 1 1 d . . .
 H32 H 0.1546 0.6740 0.2187 0.066 Uiso 1 1 calc R . .
 C33 C 0.0717(4) 0.5715(2) 0.2302(2) 0.0470(12) Uani 1 1 d . . .
 H33 H -0.0112 0.5903 0.2387 0.056 Uiso 1 1 calc R . .
 C34 C 0.0944(4) 0.4947(2) 0.22993(17) 0.0364(10) Uani 1 1 d . . .
 H34 H 0.0279 0.4612 0.2398 0.044 Uiso 1 1 calc R . .
 C35 C 0.3553(4) 0.34747(19) 0.16742(16) 0.0280(9) Uani 1 1 d . . .
 C36 C 0.4601(4) 0.2981(2) 0.17707(18) 0.0362(10) Uani 1 1 d . . .
 H36 H 0.4779 0.2757 0.2120 0.043 Uiso 1 1 calc R . .
 C37 C 0.5395(4) 0.2812(2) 0.13592(19) 0.0453(11) Uani 1 1 d . . .
 H37 H 0.6108 0.2469 0.1426 0.054 Uiso 1 1 calc R . .
 C38 C 0.5147(4) 0.3144(2) 0.08551(19) 0.0442(11) Uani 1 1 d . . .
 H38 H 0.5695 0.3032 0.0575 0.053 Uiso 1 1 calc R . .
 C39 C 0.4101(4) 0.3640(2) 0.07532(18) 0.0445(11) Uani 1 1 d . . .
 H39 H 0.3933 0.3869 0.0405 0.053 Uiso 1 1 calc R . .
 C40 C 0.3300(4) 0.3801(2) 0.11636(17) 0.0373(10) Uani 1 1 d . . .
 H40 H 0.2575 0.4136 0.1094 0.045 Uiso 1 1 calc R . .
 C41 C 0.0928(3) 0.3209(2) 0.18638(16) 0.0283(8) Uani 1 1 d . . .
 C42 C 0.0749(4) 0.2440(2) 0.19312(17) 0.0368(10) Uani 1 1 d . . .
 H42 H 0.1328 0.2167 0.2185 0.044 Uiso 1 1 calc R . .
 C43 C -0.0272(4) 0.2069(2) 0.16280(18) 0.0417(11) Uani 1 1 d . . .
 H43 H -0.0380 0.1541 0.1672 0.050 Uiso 1 1 calc R . .
 C44 C -0.1119(4) 0.2454(2) 0.12694(18) 0.0415(11) Uani 1 1 d . . .
 H44 H -0.1807 0.2194 0.1059 0.050 Uiso 1 1 calc R . .
 C45 C -0.0980(4) 0.3221(2) 0.1211(2) 0.0488(12) Uani 1 1 d . . .
 H45 H -0.1597 0.3493 0.0972 0.059 Uiso 1 1 calc R . .
 C46 C 0.0054(4) 0.3598(2) 0.14984(18) 0.0399(10) Uani 1 1 d . . .
 H46 H 0.0165 0.4124 0.1445 0.048 Uiso 1 1 calc R . .
 C1S C 0.115(3) 0.6461(16) 0.0299(14) 0.212(12) Uiso 0.45 1 d PD A 1
 C2S C 0.153(3) 0.575(2) 0.006(2) 0.191(18) Uiso 0.25 1 d PD A 1
 C3S C 0.0055(15) 0.5433(5) -0.0085(6) 0.151(5) Uiso 0.75 1 d PD . 1
 C11S C 0.118(2) 0.6130(12) 0.0718(10) 0.179(8) Uiso 0.55 1 d PD B 2
 C12S C 0.1068(13) 0.5345(9) 0.0706(6) 0.164(5) Uiso 0.75 1 d PD B 2
 C13S C 0.059(3) 0.494(2) 0.0213(13) 0.158(16) Uiso 0.25 1 d PD . 2

loop_
  _atom_site_aniso_label
  _atom_site_aniso_U_11
  _atom_site_aniso_U_22
  _atom_site_aniso_U_33
  _atom_site_aniso_U_23
  _atom_site_aniso_U_13
  _atom_site_aniso_U_12
 Os1 0.02841(8) 0.02022(7) 0.02278(8) -0.00037(7) 0.00606(5) -0.00104(6)
 Cl1 0.0493(6) 0.0220(4) 0.0306(6) -0.0018(4) 0.0098(4) 0.0006(4)
 Cl2 0.0323(5) 0.0397(5) 0.0394(6) -0.0003(5) 0.0105(4) -0.0047(4)
 P1 0.0464(6) 0.0262(5) 0.0225(6) 0.0000(4) 0.0061(5) -0.0036(4)
 P2 0.0271(5) 0.0231(5) 0.0241(6) -0.0001(4) 0.0048(4) -0.0029(4)
 Si1 0.0321(6) 0.0329(6) 0.0363(7) 0.0014(5) 0.0075(5) -0.0056(5)
 O1 0.058(2) 0.0391(17) 0.052(2) -0.0050(15) 0.0121(16) 0.0168(15)
 N1 0.054(2) 0.0309(18) 0.037(2) -0.0055(16) 0.0076(18) 0.0075(16)
 C1 0.0311(19) 0.0305(19) 0.016(2) -0.0013(16) 0.0040(15) 0.0069(16)
 C2 0.032(2) 0.0259(19) 0.030(2) 0.0042(17) 0.0048(17) -0.0018(16)
 C3 0.041(2) 0.0247(19) 0.030(2) -0.0015(17) 0.0040(18) -0.0046(17)
 C4 0.042(2) 0.0230(19) 0.027(2) 0.0007(17) 0.0041(17) 0.0073(16)
 C5 0.032(2) 0.0287(19) 0.024(2) -0.0015(17) 0.0040(16) 0.0034(16)
 C6 0.057(3) 0.029(2) 0.064(4) -0.013(2) 0.017(2) -0.009(2)
 C7 0.037(2) 0.043(2) 0.051(3) -0.006(2) 0.005(2) -0.0017(19)
 C8 0.042(3) 0.061(3) 0.055(3) -0.010(3) 0.009(2) -0.015(2)
 C9 0.059(3) 0.055(3) 0.051(3) 0.013(3) 0.023(2) 0.001(2)
 C11 0.064(3) 0.035(2) 0.023(2) -0.0017(19) 0.011(2) 0.003(2)
 C12 0.060(3) 0.038(2) 0.038(3) 0.000(2) 0.016(2) -0.004(2)
 C13 0.068(3) 0.053(3) 0.044(3) -0.001(2) 0.026(3) -0.007(2)
 C14 0.077(3) 0.060(3) 0.034(3) -0.008(2) 0.019(2) 0.006(3)
 C15 0.150(6) 0.042(3) 0.044(3) -0.002(3) 0.032(4) 0.024(3)
 C16 0.141(5) 0.041(3) 0.038(3) 0.004(2) 0.039(3) 0.004(3)
 C17 0.057(3) 0.029(2) 0.020(2) 0.0015(17) 0.0121(18) -0.0017(18)
 C18 0.066(3) 0.036(2) 0.036(3) 0.005(2) 0.010(2) -0.003(2)
 C19 0.084(4) 0.036(2) 0.043(3) -0.002(2) 0.015(3) -0.018(2)
 C20 0.105(4) 0.031(2) 0.044(3) 0.005(2) 0.020(3) 0.000(3)
 C21 0.090(4) 0.041(3) 0.048(3) 0.008(2) 0.019(3) 0.015(3)
 C22 0.063(3) 0.037(2) 0.033(3) 0.005(2) 0.015(2) 0.008(2)
 C23 0.059(3) 0.037(2) 0.030(3) 0.0089(19) -0.011(2) -0.006(2)
 C24 0.095(4) 0.051(3) 0.044(3) 0.005(3) -0.019(3) -0.008(3)
 C25 0.132(7) 0.075(4) 0.060(5) 0.011(4) -0.052(4) -0.036(4)
 C26 0.088(5) 0.119(6) 0.108(7) 0.061(6) -0.052(5) -0.047(5)
 C27 0.053(3) 0.131(6) 0.067(4) 0.050(4) -0.017(3) -0.022(3)
 C28 0.045(3) 0.078(3) 0.045(3) 0.020(3) -0.005(2) -0.010(2)
 C29 0.039(2) 0.0228(18) 0.019(2) 0.0005(16) 0.0039(16) 0.0000(16)
 C30 0.043(2) 0.029(2) 0.036(3) 0.0048(19) 0.0073(19) -0.0031(18)
 C31 0.064(3) 0.030(2) 0.055(3) 0.008(2) 0.012(2) -0.014(2)
 C32 0.080(4) 0.024(2) 0.061(4) 0.001(2) 0.012(3) 0.004(2)
 C33 0.054(3) 0.033(2) 0.055(3) -0.004(2) 0.013(2) 0.009(2)
 C34 0.038(2) 0.034(2) 0.037(3) -0.0051(19) 0.0053(19) -0.0014(18)
 C35 0.033(2) 0.0252(19) 0.026(2) -0.0028(16) 0.0061(16) -0.0056(15)
 C36 0.036(2) 0.038(2) 0.036(3) 0.001(2) 0.0122(19) 0.0013(18)
 C37 0.043(3) 0.049(3) 0.046(3) 0.001(2) 0.016(2) 0.006(2)
 C38 0.051(3) 0.041(3) 0.044(3) -0.011(2) 0.026(2) -0.009(2)
 C39 0.059(3) 0.049(3) 0.027(3) -0.001(2) 0.011(2) -0.012(2)
 C40 0.042(2) 0.043(2) 0.027(2) 0.002(2) 0.0054(19) 0.0027(19)
 C41 0.0277(19) 0.030(2) 0.028(2) -0.0023(17) 0.0079(16) -0.0029(16)
 C42 0.044(2) 0.033(2) 0.033(3) -0.0004(19) 0.0001(19) -0.0062(18)
 C43 0.051(3) 0.034(2) 0.040(3) -0.004(2) 0.007(2) -0.016(2)
 C44 0.033(2) 0.053(3) 0.038(3) -0.015(2) 0.0042(19) -0.012(2)
 C45 0.043(2) 0.052(3) 0.049(3) -0.006(2) -0.006(2) 0.006(2)
 C46 0.036(2) 0.040(2) 0.043(3) -0.002(2) -0.002(2) 0.0004(18)

_geom_special_details
;
 All esds (except the esd in the dihedral angle between two l.s. planes) 
 are estimated using the full covariance matrix.  The cell esds are taken 
 into account individually in the estimation of esds in distances, angles 
 and torsion angles; correlations between esds in cell parameters are only 
 used when they are defined by crystal symmetry.  An approximate (isotropic) 
 treatment of cell esds is used for estimating esds involving l.s. planes. 
;
loop_
  _geom_bond_atom_site_label_1
  _geom_bond_atom_site_label_2
  _geom_bond_distance
  _geom_bond_site_symmetry_2
  _geom_bond_publ_flag
 Os1 Cl1 2.4502(9) . ?
 Os1 Cl2 2.4612(9) . ?
 Os1 P1 2.4346(11) . ?
 Os1 P2 2.4209(10) . ?
 Os1 C1 1.770(4) . ?
 Os1 C5 1.992(3) . ?
 P1 C11 1.832(4) . ?
 P1 C17 1.830(4) . ?
 P1 C23 1.827(4) . ?
 P2 C29 1.821(3) . ?
 P2 C35 1.828(4) . ?
 P2 C41 1.823(4) . ?
 Si1 C2 1.898(4) . ?
 Si1 C7 1.852(4) . ?
 Si1 C8 1.866(4) . ?
 Si1 C9 1.868(5) . ?
 O1 N1 1.235(4) . ?
 N1 C4 1.418(4) . ?
 C1 C2 1.363(5) . ?
 C2 C3 1.405(5) . ?
 C3 C4 1.451(5) . ?
 C3 C6 1.506(5) . ?
 C4 C5 1.381(5) . ?
 C11 C12 1.366(5) . ?
 C11 C16 1.382(6) . ?
 C12 C13 1.391(6) . ?
 C13 C14 1.375(6) . ?
 C14 C15 1.352(7) . ?
 C15 C16 1.389(7) . ?
 C17 C18 1.388(6) . ?
 C17 C22 1.382(6) . ?
 C18 C19 1.393(6) . ?
 C19 C20 1.364(7) . ?
 C20 C21 1.356(7) . ?
 C21 C22 1.385(6) . ?
 C23 C24 1.388(6) . ?
 C23 C28 1.397(6) . ?
 C24 C25 1.420(8) . ?
 C25 C26 1.353(10) . ?
 C26 C27 1.356(10) . ?
 C27 C28 1.391(6) . ?
 C29 C30 1.393(5) . ?
 C29 C34 1.382(5) . ?
 C30 C31 1.395(5) . ?
 C31 C32 1.385(6) . ?
 C32 C33 1.381(6) . ?
 C33 C34 1.381(5) . ?
 C35 C36 1.383(5) . ?
 C35 C40 1.386(5) . ?
 C36 C37 1.390(6) . ?
 C37 C38 1.375(6) . ?
 C38 C39 1.386(6) . ?
 C39 C40 1.389(6) . ?
 C41 C42 1.388(5) . ?
 C41 C46 1.386(5) . ?
 C42 C43 1.386(5) . ?
 C43 C44 1.357(6) . ?
 C44 C45 1.376(6) . ?
 C45 C46 1.383(6) . ?
 C1S C2S 1.47(3) . ?
 C2S C3S 1.61(3) . ?
 C3S C3S 1.597(16) 3_565 ?
 C11S C12S 1.395(18) . ?
 C12S C13S 1.45(2) . ?
 C13S C13S 1.53(2) 3_565 ?

loop_
  _geom_angle_atom_site_label_1
  _geom_angle_atom_site_label_2
  _geom_angle_atom_site_label_3
  _geom_angle
  _geom_angle_site_symmetry_1
  _geom_angle_site_symmetry_3
  _geom_angle_publ_flag
 Cl1 Os1 Cl2 89.95(3) . . ?
 P1 Os1 Cl1 87.04(3) . . ?
 P1 Os1 Cl2 85.76(4) . . ?
 P2 Os1 Cl1 90.56(3) . . ?
 P2 Os1 Cl2 90.05(3) . . ?
 P2 Os1 P1 175.17(3) . . ?
 C1 Os1 Cl1 106.36(11) . . ?
 C1 Os1 Cl2 163.67(11) . . ?
 C1 Os1 P1 95.79(12) . . ?
 C1 Os1 P2 88.90(12) . . ?
 C1 Os1 C5 79.12(15) . . ?
 C5 Os1 Cl1 174.45(11) . . ?
 C5 Os1 Cl2 84.59(11) . . ?
 C5 Os1 P1 91.56(11) . . ?
 C5 Os1 P2 90.43(11) . . ?
 C11 P1 Os1 117.64(14) . . ?
 C17 P1 Os1 114.34(13) . . ?
 C17 P1 C11 103.61(18) . . ?
 C23 P1 Os1 112.04(15) . . ?
 C23 P1 C11 104.5(2) . . ?
 C23 P1 C17 103.20(19) . . ?
 C29 P2 Os1 109.83(12) . . ?
 C29 P2 C35 104.04(17) . . ?
 C29 P2 C41 105.61(17) . . ?
 C35 P2 Os1 117.34(13) . . ?
 C41 P2 Os1 118.32(13) . . ?
 C41 P2 C35 100.13(16) . . ?
 C7 Si1 C2 108.43(18) . . ?
 C7 Si1 C8 110.8(2) . . ?
 C7 Si1 C9 106.9(2) . . ?
 C8 Si1 C2 109.90(19) . . ?
 C8 Si1 C9 112.7(2) . . ?
 C9 Si1 C2 107.96(18) . . ?
 O1 N1 C4 115.6(3) . . ?
 C2 C1 Os1 154.7(3) . . ?
 C1 C2 Si1 121.0(3) . . ?
 C1 C2 C3 110.6(3) . . ?
 C3 C2 Si1 128.2(3) . . ?
 C2 C3 C4 120.8(3) . . ?
 C2 C3 C6 120.2(3) . . ?
 C4 C3 C6 119.0(3) . . ?
 N1 C4 C3 113.8(3) . . ?
 C5 C4 N1 121.2(3) . . ?
 C5 C4 C3 125.0(3) . . ?
 C4 C5 Os1 129.7(3) . . ?
 C12 C11 P1 122.2(3) . . ?
 C12 C11 C16 117.6(4) . . ?
 C16 C11 P1 120.0(3) . . ?
 C11 C12 C13 121.7(4) . . ?
 C14 C13 C12 120.0(4) . . ?
 C15 C14 C13 118.7(5) . . ?
 C14 C15 C16 121.5(5) . . ?
 C11 C16 C15 120.4(5) . . ?
 C18 C17 P1 118.6(3) . . ?
 C22 C17 P1 122.3(3) . . ?
 C22 C17 C18 119.1(4) . . ?
 C17 C18 C19 119.7(4) . . ?
 C20 C19 C18 120.2(5) . . ?
 C21 C20 C19 120.2(4) . . ?
 C20 C21 C22 120.7(5) . . ?
 C17 C22 C21 120.0(5) . . ?
 C24 C23 P1 123.0(4) . . ?
 C24 C23 C28 119.3(5) . . ?
 C28 C23 P1 117.6(3) . . ?
 C23 C24 C25 118.8(6) . . ?
 C26 C25 C24 120.0(6) . . ?
 C25 C26 C27 122.1(7) . . ?
 C26 C27 C28 119.3(7) . . ?
 C27 C28 C23 120.6(5) . . ?
 C30 C29 P2 120.5(3) . . ?
 C34 C29 P2 119.8(3) . . ?
 C34 C29 C30 119.5(3) . . ?
 C29 C30 C31 119.1(4) . . ?
 C32 C31 C30 121.0(4) . . ?
 C33 C32 C31 119.3(4) . . ?
 C34 C33 C32 120.1(4) . . ?
 C33 C34 C29 121.0(4) . . ?
 C36 C35 P2 121.0(3) . . ?
 C36 C35 C40 119.5(4) . . ?
 C40 C35 P2 119.3(3) . . ?
 C35 C36 C37 120.4(4) . . ?
 C38 C37 C36 119.8(4) . . ?
 C37 C38 C39 120.4(4) . . ?
 C38 C39 C40 119.6(4) . . ?
 C35 C40 C39 120.3(4) . . ?
 C42 C41 P2 118.5(3) . . ?
 C46 C41 P2 122.2(3) . . ?
 C46 C41 C42 118.8(4) . . ?
 C43 C42 C41 120.1(4) . . ?
 C44 C43 C42 120.7(4) . . ?
 C43 C44 C45 119.9(4) . . ?
 C44 C45 C46 120.3(4) . . ?
 C45 C46 C41 120.1(4) . . ?
 C1S C2S C3S 96(2) . . ?
 C3S C3S C2S 111(2) 3_565 . ?
 C11S C12S C13S 122(2) . . ?
 C12S C13S C13S 133(3) . 3_565 ?
